# Supplementary material for: Resonant excitation energy transfer from carbon dots to different sized silver nanoparticles
Source: Royal Society of Chemistry journal article supplement (doi:10.1039/c6cp05451j), 2016-01-01

# Electronic Supplementary Information

## Resonant excitation energy transfer from carbon dots to different sized silver nanoparticles

*Roopali Prajapati, Arpan Bhattacharya, and Tushar Kanti Mukherjee\**

Discipline of Chemistry, Indian Institute of Technology Indore, Simrol, Khandwa Road,

Indore-453552, M.P., India.

---

\*Corresponding author. E-mail: [tusharm@iiti.ac.in](mailto:tusharm@iiti.ac.in); Tel: +91-7312438779.

**Fig. S1** Powder XRD pattern of the synthesized CD.

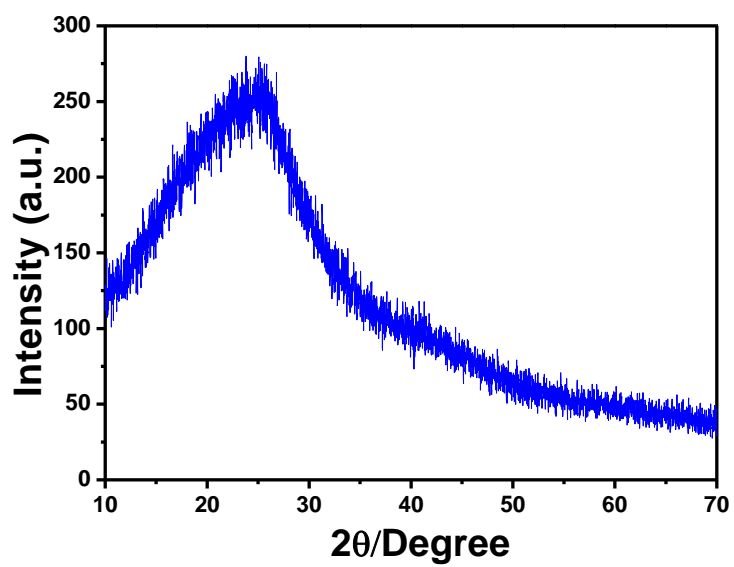

Fig. S2 FTIR spectrum of Ag NPs.

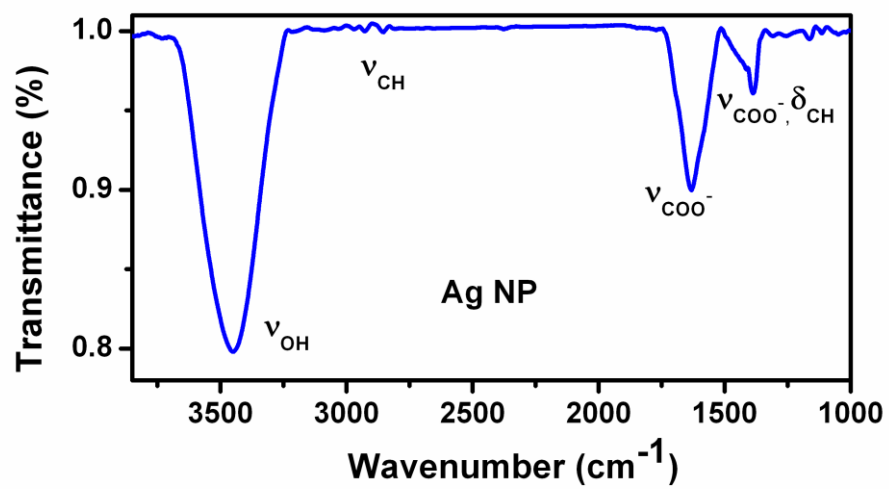

**Fig. S3** Changes in the absorption spectra of CD upon addition of 20 pM s, m, l – Ag NPs.

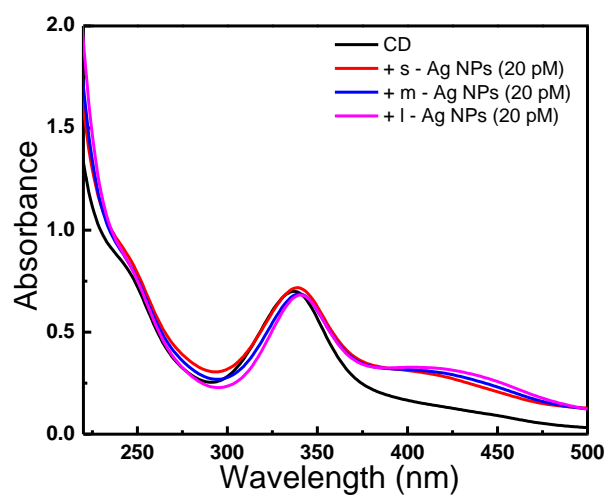

**Fig. S4** Normalized excitation spectra of CD ( $\lambda_{em} = 495$  nm) upon addition of 20 pM s, m, and l - Ag NPs.

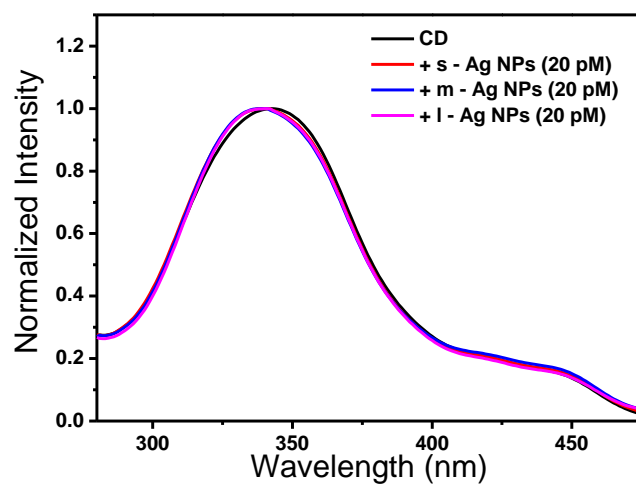

Supplement: c6cp05451j1.pdf [file c6cp05451j1.pdf]
